# Supplementary material for: Peracetic acid to reduce disinfection by-product formation in drinking water
Source: Royal Society of Chemistry journal article supplement (doi:10.1039/d3ew00581j), 2024-01-01
Supplement: d3ew00581j1.pdf [file d3ew00581j1.pdf]

*Supplementary Information*

**Peracetic Acid to Reduce Disinfection By-product Formation in Drinking Water**

*Subhajit Mondal<sup>1,2</sup>, Erin Mackey<sup>3</sup>, Ron Hofmann<sup>1</sup>,*

<sup>1</sup>Department of Civil & Mineral Engineering, University of Toronto, Ontario, Canada, M5S 1A4

<sup>2</sup>R.V. Anderson Associates Limited, North York, Ontario, Canada, M2J 4Z8

<sup>3</sup>Brown and Caldwell, Walnut Creek, California, United States, 94596

**Summary**

8 pages including 5 figures and 3 tables

## 1. DBPs monitored

**Table S1:** List of DBPs monitored for each of the four waters

| Group                      | Compounds                        | Chemical Structure                                                                   | Retention time in GC-ECD (in mins) |
|----------------------------|----------------------------------|--------------------------------------------------------------------------------------|------------------------------------|
| Trihalomethanes (THMs)     | Trichloromethane (TCM)           | 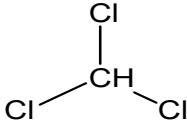   | 3.24                               |
|                            | Bromodichloromethane (BDCM)      |    | 4.72                               |
|                            | Dibromochloromethane (DBCM)      |    | 8.26                               |
|                            | Tribromomethane (TBM)            |    | 14.24                              |
| Haloacetic acids (HAAs)    | Monochloroacetic acid (MCAA)     |   | 8.20                               |
|                            | Monobromoacetic acid (MBAA)      |  | 9.98                               |
|                            | Dichloroacetic acid (DCAA)       |  | 10.94                              |
|                            | Trichloroacetic acid (TCAA)      |  | 16.65                              |
|                            | Bromodichloroacetic acid (BDCAA) |  | 23.04                              |
| Adsorbable organic halides | N/A                              | N/A                                                                                  | N/A                                |

## 2. Text S1. Role of PAA versus H<sub>2</sub>O<sub>2</sub>

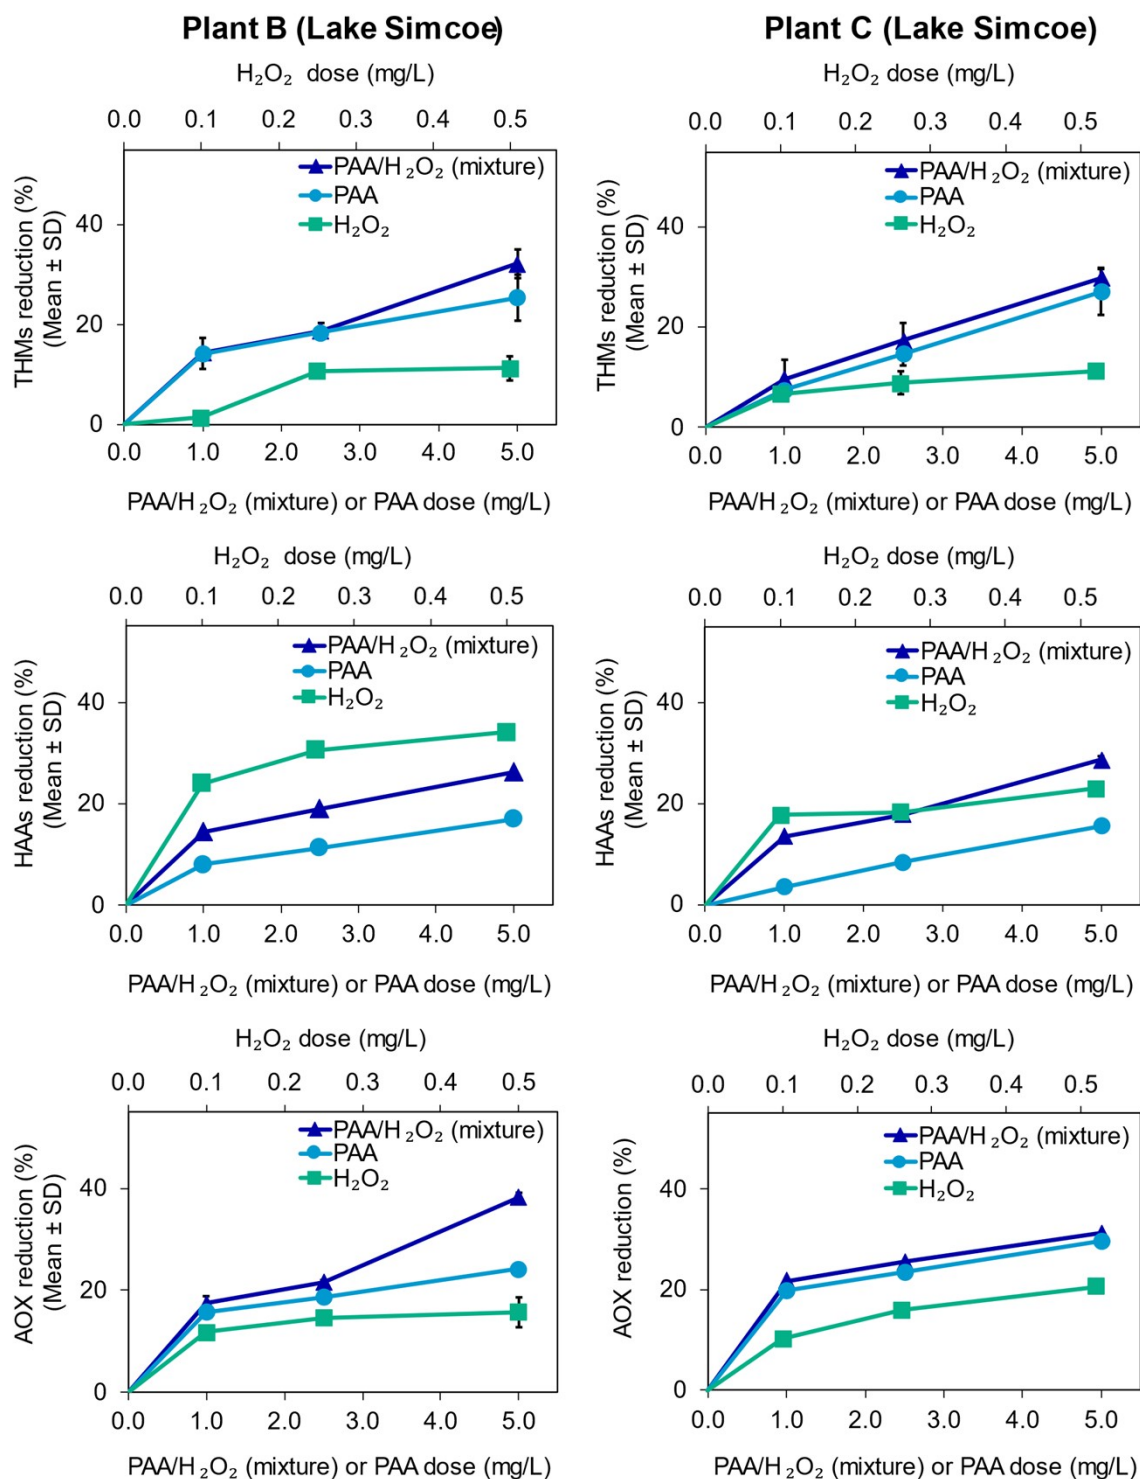

**Figure S1:** Role of PAA and  $\text{H}_2\text{O}_2$  on the reduction of THM, HAA and AOX formation potential for Plant B (Lake Simcoe) and Plant C (Lake Simcoe).

**Plant D (Lake Ontario)**

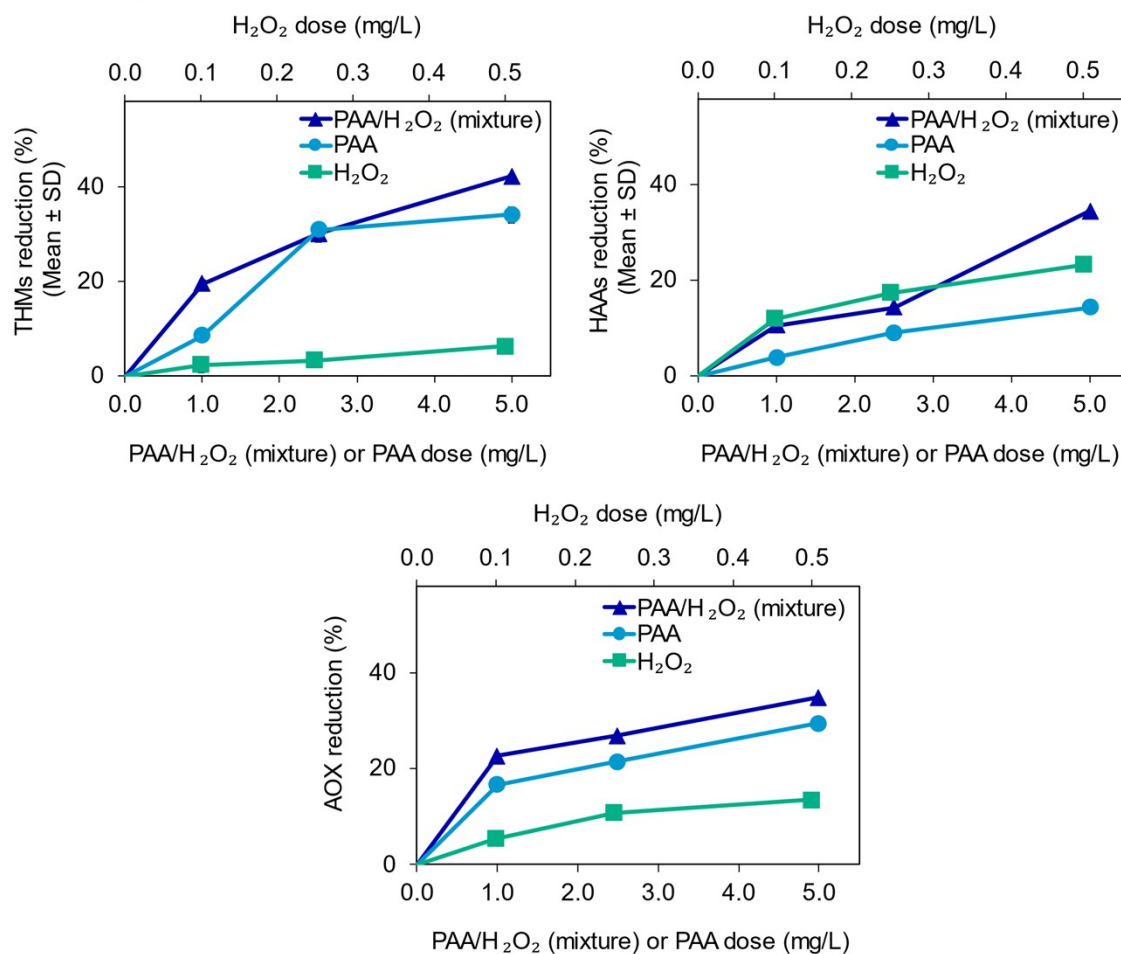

**Figure S2:** Role of PAA and  $\text{H}_2\text{O}_2$  on the reduction of THM, HAA and AOX formation potential for Plant D (Lake Ontario). The error bars indicate the 95% confidence intervals based on the Student's t-distribution.

### 3. Text S2. Effect of pH

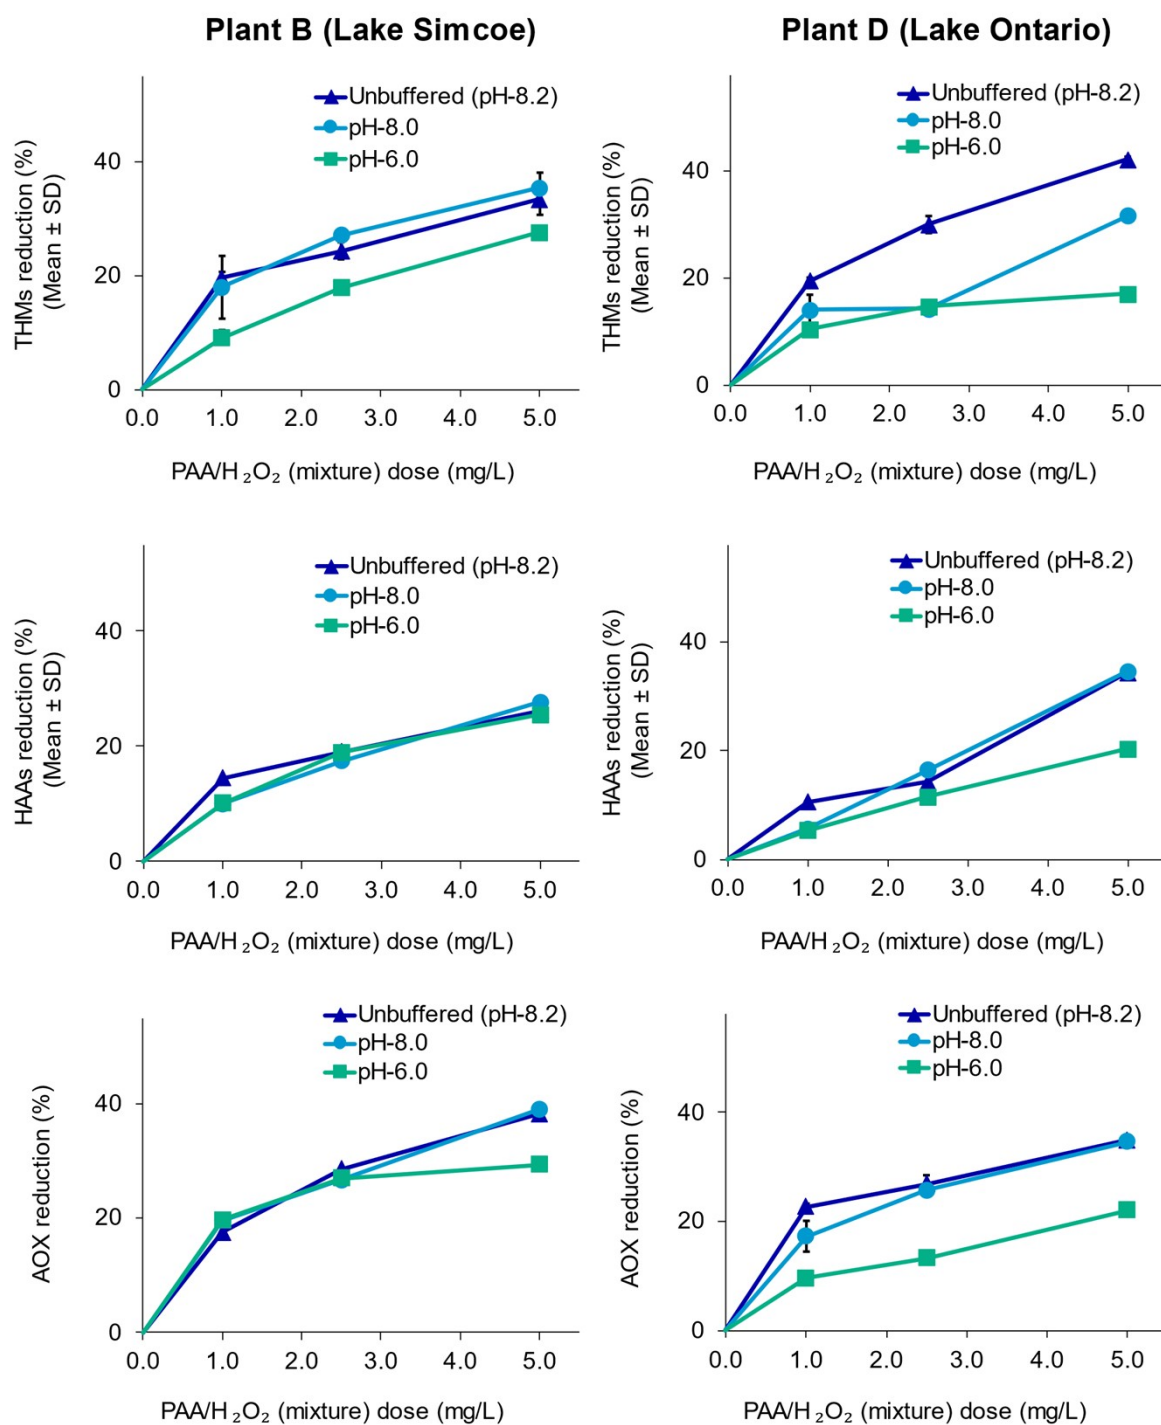

**Figure S3:** Comparison of DBP reduction (%) across different pH conditions for Plant B (Lake Simcoe) and Plant D (Lake Ontario).

### Plant A (Otonabee River)

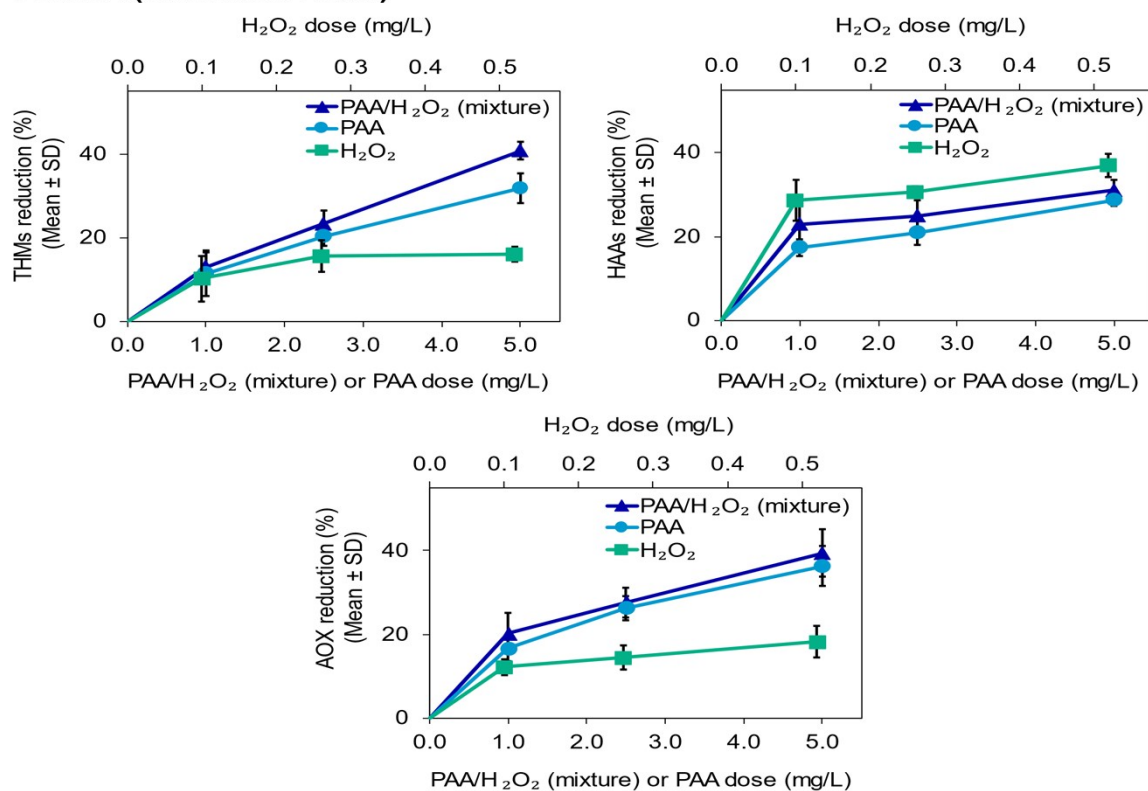

**Figure S4:** Comparison of DBP reduction (%) across different pH conditions for Plant A (Otonabee River) under the conditions tested. The error bars indicate the 95% confidence intervals based on the Student's t-distribution.

### 4. Text S3. Applying PAA/H<sub>2</sub>O<sub>2</sub> (mixture) post-filter

**Table S2:** Filtered water quality parameters collected from Plant A (Otonabee River) and Plant B (Lake Simcoe)

| Parameter                             | Plant A          | Plant B         |
|---------------------------------------|------------------|-----------------|
|                                       | (Otonabee River) | (Lake Simcoe)   |
| pH                                    | 7.1-7.3          | 7.2-7.4         |
| Dissolved organic carbon (mg/L)       | 2.9-2.94         | 3.22-3.28       |
| Turbidity (NTU)                       | 0.054            | 0.064           |
| UV <sub>254</sub> (cm <sup>-1</sup> ) | 0.064            | 0.036           |
| Treatment type                        | Conventional     | Microfiltration |

### Plant B (Lake Simcoe)

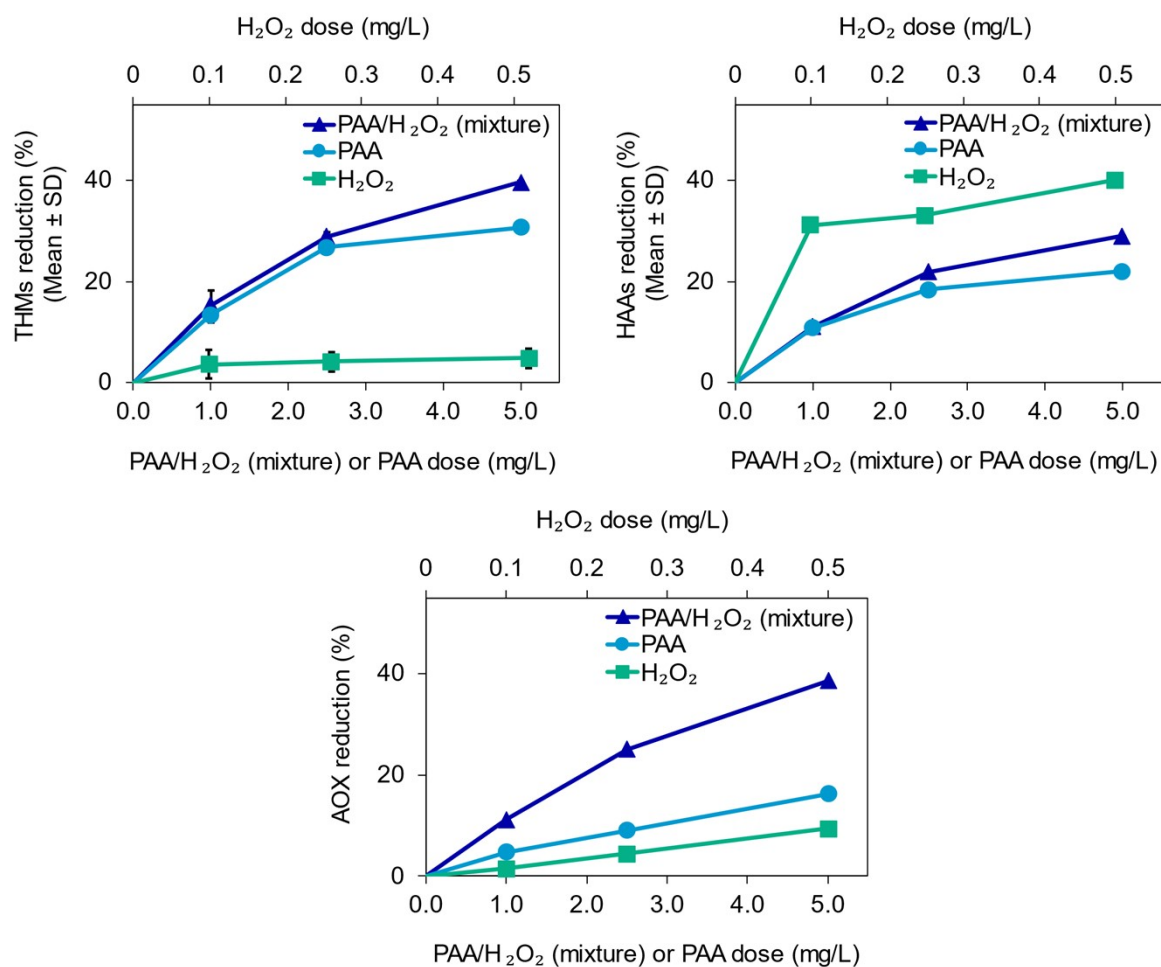

**Figure S5:** Impact of 15-minute PAA/H<sub>2</sub>O<sub>2</sub> (mixture) treatment on the DBP formation potential (THMs, HAAs and AOX) of filtered water collected from Plant B (Lake Simcoe). The error bars indicate the 95% confidence intervals based on the Student's t-distribution.

## 5. Effect of PAA/H<sub>2</sub>O<sub>2</sub> (mixture), PAA, and H<sub>2</sub>O<sub>2</sub> on pH

**Table S3:** Effect of PAA/H<sub>2</sub>O<sub>2</sub> (mixture), PAA and H<sub>2</sub>O<sub>2</sub> doses on the pH of different source waters

| Oxidant                           | Dose (mg/L) | Plant B<br>(Lake Simcoe) | Plant C<br>(Lake Simcoe) | Plant D<br>(Lake Ontario) |
|-----------------------------------|-------------|--------------------------|--------------------------|---------------------------|
| Raw water <sup>1</sup>            | N/A         | 8.20                     | 8.22                     | 8.20                      |
| PAA/H <sub>2</sub> O <sub>2</sub> | 1.0         | 8.04                     | 8.02                     | 7.98                      |
|                                   | 2.5         | 7.86                     | 7.78                     | 7.76                      |
|                                   | 5.0         | 7.70                     | 7.62                     | 7.52                      |
| PAA                               | 1.0         | 8.02                     | 8.04                     | 7.94                      |
|                                   | 2.5         | 7.88                     | 7.82                     | 7.78                      |
|                                   | 5.0         | 7.72                     | 7.64                     | 7.60                      |
| H <sub>2</sub> O <sub>2</sub>     | 0.1         | 8.18                     | 8.22                     | 8.18                      |
|                                   | 0.25        | 8.18                     | 8.18                     | 8.16                      |
|                                   | 0.5         | 8.16                     | 8.18                     | 8.16                      |

<sup>1</sup>Raw water pH without addition of any oxidants
